# Supplementary material for: Mathematical Relationships between Spinal Motoneuron Properties
Source: bioRxiv preprint, doi:10.1101/2021.08.05.455188, version 5 (2022-06-01)
Supplement: data for Figure 3 [file 455188_file06.xlsx]

## Sheet: Eccles 1957
1/CV	CV	% CV	AHP	% AHP
9.70311	0.10306	100	45.0317	24.4742
10.6478	0.0939158	91.1275	54.6496	29.7014
10.283	0.0972476	94.3604	54.1276	29.4177
10.1107	0.0989048	95.9684	58.3783	31.7279
10.109	0.0989217	95.9848	62.1763	33.7921
10.5477	0.0948076	91.9928	60.8088	33.0488
10.7148	0.0933291	90.5582	67.9521	36.9311
10.9336	0.0914614	88.746	68.4552	37.2045
11.0307	0.0906561	87.9646	68.9425	37.4694
11.6143	0.0861008	83.5445	69.9676	38.0266
12.1279	0.0824543	80.0063	64.3368	34.9663
12.0706	0.082846	80.3863	83.3205	45.2837
12.5306	0.0798048	77.4355	88.6026	48.1544
11.3923	0.087779	85.1729	76.5858	41.6234
10.808	0.0925241	89.7771	76.9849	41.8404
10.3465	0.096651	93.7815	75.026	40.7757
10.3448	0.0966672	93.7973	78.824	42.8399
10.199	0.098049	95.1381	78.3304	42.5716
10.1494	0.0985276	95.6024	80.2231	43.6003
10.3398	0.0967138	93.8425	89.7433	48.7744
11.0716	0.0903215	87.6399	86.0398	46.7616
11.2087	0.0892165	86.5677	105.523	57.3507
11.3045	0.0884602	85.8339	108.859	59.1637
11.477	0.0871306	84.5438	104.134	56.5955
10.908	0.0916757	88.954	124.476	67.651
11.9368	0.0837746	81.2874	109.891	59.7243
12.349	0.0809784	78.5743	113.268	61.5595
12.4965	0.0800225	77.6467	109.963	59.7636
12.498	0.0800128	77.6373	106.64	57.9575
12.5565	0.07964	77.2756	138.458	75.25
13.5551	0.073773	71.5828	136.688	74.2881
13.7354	0.0728046	70.6431	114.871	62.4312
14.5824	0.068576	66.5401	125.426	68.1676
14.983	0.0667424	64.7609	100.79	54.7779
14.1427	0.070708	68.6088	182.342	99.1009
14.1933	0.0704558	68.3641	178.076	96.7822
14.5868	0.0685553	66.52	169.106	91.9072
15.9185	0.0628201	60.9551	183.997	100
16.0242	0.0624054	60.5527	165.494	89.9441
18.7498	0.053334	51.7506	165.847	90.1359
15.3737	0.0650461	63.115	151.167	82.1572
16.6419	0.0600892	58.3052	145.159	78.892

## Sheet: Kernell 1966
CV	% CV	R	%R		R	%R	Ith	%Ith
118.601	100	0.771608	14.9231		0.955556	21.1823	27.1574	100
117.611	99.1658	0.718427	13.8946		0.622222	13.7931	22.6668	83.4644
116.045	97.8454	1.1948	23.1077		1.67778	37.1921	18.8797	69.5193
116.045	97.8454	1.35886	26.2807		1.34444	29.803	17.0407	62.7478
117.611	99.1658	1.68457	32.5801		0.933333	20.6897	16.2363	59.786
111.472	93.989	0.564007	10.908		0.444444	9.85222	16.3317	60.1372
110.542	93.2049	0.693117	13.4051		0.466667	10.3448	14.2191	52.3581
108.523	91.5028	0.678202	13.1166		1.56667	34.7291	12.0494	44.3688
106.541	89.8319	0.590371	11.4179		1.57778	34.9754	11.2403	41.3895
104.771	88.3393	0.520467	10.066		1.15556	25.6158	8.8181	32.4703
104.246	87.8964	0.849496	16.4295		1.58889	35.2217	8.22896	30.301
105.653	89.0825	0.847086	16.3829		2.17778	48.2759	10.9639	40.3717
103.897	87.6023	1.01416	19.6141		2.26667	50.2463	9.97416	36.7272
106.007	89.3815	1.01055	19.5442		2.47778	54.9261	9.4774	34.898
110.727	93.3612	1.03917	20.0978		2.92222	64.7783	9.8769	36.3691
108.705	91.6563	1.24301	24.04		3.27778	72.6601	10.6819	39.3332
104.771	88.3393	1.24963	24.1682		4.25556	94.335	4.69338	17.2821
100.98	85.1423	0.727617	14.0723		4.51111	100	2.57815	9.49336
99.3017	83.7277	0.748859	14.4831
98.9695	83.4476	1.05936	20.4883
99.3017	83.7277	1.20459	23.2971
97.4883	82.1987	1.13499	21.9509
102.171	86.1468	1.63697	31.6593
106.007	89.3815	1.73971	33.6465
102.171	86.1468	2.03801	39.4156
102	86.0026	2.14768	41.5368
97.9796	82.6129	1.6445	31.805
93.9603	79.224	1.45151	28.0726
92.2444	77.7772	1.2543	24.2586
97.4883	82.1987	2.10113	40.6364
97.4883	82.1987	2.64801	51.2131
93.1764	78.5631	2.29156	44.3193
89.3542	75.3403	1.71576	33.1832
88.3123	74.4618	2.44703	47.3263
88.9062	74.9625	2.60989	50.476
90.5599	76.3569	2.78887	53.9374
89.955	75.8469	3.31872	64.1849
87.7224	73.9644	3.30501	63.9197
81.3517	68.5928	2.97222	57.4834
81.3517	68.5928	2.51649	48.6695
82.3114	69.4021	2.25917	43.6929
75.0653	63.2924	2.98668	57.7631
75.4436	63.6113	3.35036	64.7968
76.7183	64.6861	4.5687	88.3598
76.5898	64.5778	5.17056	100
70.6714	59.5876	4.45586	86.1774
69.033	58.2062	3.63976	70.394
66.9822	56.477	3.57227	69.0886
		5.17056

## Sheet: Burke 1968
CV	%CV	R	%R
78.7421	61.9099	2.03874	62.1302
78.3539	61.6047	1.66513	50.7445
79.5757	62.5653	1.51979	46.3154
83.7165	65.8209	1.5498	47.2298
86.4426	67.9643	1.55695	47.4476
84.9412	66.7839	2.20844	67.3016
89.4467	70.3262	1.92484	58.6589
89.3569	70.2556	1.7751	54.0958
90.4406	71.1077	1.82951	55.7539
95.2788	74.9116	2.46431	75.0994
95.1431	74.805	2.7547	83.9488
100.249	78.8193	3.01491	91.8786
108.301	85.1506	3.2814	100
96.9743	76.2447	1.92239	58.5845
95.7863	75.3106	1.82786	55.7037
94.3716	74.1984	1.80074	54.8772
98.4612	77.4138	1.44017	43.889
104.304	82.0077	1.76169	53.6871
110.35	86.7608	2.3015	70.1375
107.354	84.4056	1.7968	54.7571
105.664	83.0768	1.42393	43.3941
97.2582	76.4679	0.922634	28.1171
101.977	80.178	0.820572	25.0067
104.933	82.5024	0.783633	23.881
107.126	84.2265	0.748454	22.809
107.548	84.5582	0.795274	24.2358
103.214	81.1509	0.701246	21.3703
105.197	82.71	0.64647	19.701
108.417	85.2411	0.511892	15.5998
106.049	83.3796	0.446674	13.6123
105.129	82.656	0.345089	10.5165
118.177	92.9148	0.413165	12.5911
116.787	91.822	0.580135	17.6795
122.923	96.6463	0.518455	15.7998
127.188	100	0.495007	15.0852
126.904	99.7763	0.653963	19.9294
113.657	89.3616	0.794455	24.2108
113.757	89.4398	0.827276	25.211
112.771	88.6649	0.840076	25.6011
112.538	88.4811	0.897257	27.3437
111.574	87.7233	0.831781	25.3483
109.307	85.941	0.751976	22.9163
109.594	86.1671	0.88866	27.0817
107.616	84.6117	0.944633	28.7875
108.802	85.5439	1.0036	30.5844
106.839	84.0009	0.998859	30.44
104.433	82.1091	1.02488	31.233
104.636	82.2683	1.09456	33.3565
107.913	84.8454	1.07203	32.6698
110.088	86.5552	1.10468	33.6649
109.298	85.9339	1.23499	37.6361
110.356	86.7661	1.41562	43.1408
113.953	89.5938	1.43641	43.7744
119.874	94.2493	1.26439	38.532
115.844	91.0804	1.23363	37.5945
115.449	90.7705	1.03339	31.4922
119.37	93.8527	1.06455	32.442
121.793	95.7577	0.966534	29.4549
120.071	94.4043	0.873719	26.6264
125.853	98.9503	0.872867	26.6004

## Sheet: Burke 1971
R	%R	tau	%tau
0.817259	24.1742	2.75503	26.4902
0.614213	18.1682	3.25136	31.2625
0.461929	13.6637	5.72238	55.0218
0.568528	16.8168	4.51119	43.376
0.771574	22.8228	3.99016	38.3662
0.761421	22.5225	4.73103	45.4898
0.675127	19.97	5.10246	49.0612
0.807107	23.8739	5.44651	52.3693
0.857868	25.3754	5.24835	50.464
0.908629	26.8769	5.6181	54.0191
0.93401	27.6276	6.38322	61.3759
0.939086	27.7778	6.35846	61.1379
0.908629	26.8769	7.51933	72.2999
0.649746	19.2192	8.33734	80.1652
1.01523	30.03	9.41925	90.568
1.55838	46.0961	10.4002	100
1.33503	39.4895	7.93382	76.2853
1.09137	32.2823	5.88745	56.609
1.36041	40.2402	4.5261	43.5194
1.54315	45.6456	7.88187	75.7858
1.86294	55.1051	8.42113	80.9709
2.29949	68.018	8.61327	82.8183
2.40102	71.021	5.40214	51.9427
2.09137	61.8619	2.7393	26.3389
2.70558	80.03	6.4848	62.3527
3.38071	100	6.13079	58.9488

## Sheet: Barrett 1974
S	%S	CV	%CV	R	%R	tau	%tau							RN	Surface	1/S	RN	RN*S	Rm	RN
250000	100	117	100	1.03	29.0141	4.7	62.6667							1.03	250	0.004	1.03	257.5	2200	1.03
222000	88.8	95	81.1966	1.15	32.3944	3.2	42.6667							1.15	222	0.0045045	1.15	255.3	1625	1.15
141000	56.4	107	91.453	1.26	35.493	3.7	49.3333							1.3	125	0.008	1.3	162.5	1960	1.3
125000	50	109	93.1624	1.3	36.6197	5	66.6667							1.45	179	0.00558659	1.45	259.55	2215	1.45
179000	71.6	99	84.6154	1.45	40.8451	7.4	98.6667							1.72	146	0.00684932	1.72	251.12	1950	1.72
146000	58.4	92	78.6325	1.72	48.4507	3.3	44							2.07	129	0.00775194	2.07	267.03	2825	2.07
129000	51.6	70	59.8291	2.07	58.3099	5.2	69.3333							2.3	92	0.0108696	2.3	211.6	2350	2.3
92100	36.84	81	69.2308	2.3	64.7887	5.5	73.3333							2.9	79	0.0126582	2.9	229.1	2120	2.9
79400	31.76	80	68.3761	2.9	81.6901	7.5	100							3.55	83	0.0120482	3.55	294.65	2990	3.55
83400	33.36			3.55	100	6.3	84

## Sheet: Gustafsson 1979
AHP	%AHP	R	%R		R	%R	tau	%tau
52.1834	41.7164	0.984261	36.7362		0.728302	24.338	3.31158	34.2607
57.0538	45.6099	0.783721	29.2513		0.762264	25.4729	3.26551	33.7841
57.0662	45.6198	0.818805	30.5607		0.784906	26.2295	3.49006	36.1072
58.7254	46.9463	0.85331	31.8486		0.818868	27.3644	2.9485	30.5044
59.91	47.8932	0.876286	32.7062		0.85283	28.4994	3.1727	32.8239
56.8887	45.4779	0.98261	36.6745		0.932075	31.1475	3.21537	33.2653
57.1364	45.6759	1.01761	37.9809		1	33.4174	3.16828	32.7782
55.2625	44.1779	1.04166	38.8785		1.07925	36.0656	3.1659	32.7536
55.5514	44.4089	1.19361	44.5497		0.943396	31.5259	3.62043	37.456
56.9713	45.5439	1.2165	45.4041		0.920755	30.7692	3.93643	40.7252
57.2272	45.7485	1.27489	47.5834		0.988679	33.0391	3.97943	41.1702
59.5179	47.5798	1.09865	41.0054		0.818868	27.3644	5.38093	55.6697
60.4631	48.3354	1.11001	41.4296		1.12453	37.5788	3.93031	40.6619
65.2716	52.1794	0.734054	27.3976		1.07925	36.0656	4.20194	43.4721
68.7964	54.9972	0.721122	26.9149		1.02264	34.174	4.51895	46.7519
68.1319	54.466	0.838314	31.2889		1.03396	34.5523	4.87897	50.4766
69.8077	55.8056	0.919597	34.3227		1.06792	35.6873	5.19327	53.7282
70.9799	56.7427	0.90749	33.8708		1.11321	37.2005	5.55227	57.4423
70.0842	56.0267	1.03646	38.6844		1.13585	37.9571	5.82186	60.2314
70.1172	56.0531	1.13001	42.1762		1.24906	41.7402	5.59323	57.8661
65.3706	52.2586	1.01472	37.8731		1.26038	42.1185	5.27758	54.6005
63.2822	50.589	1.09733	40.9561		1.30566	43.6318	4.87081	50.3922
62.3741	49.8631	1.19121	44.4603		1.26038	42.1185	4.55686	47.1441
63.1047	50.4471	1.26113	47.0699		1.19245	39.8487	4.24358	43.903
65.4326	52.308	1.19014	44.4203		1.14717	38.3354	3.74945	38.7908
69.4692	55.535	1.29398	48.2962		1.6	53.4678	3.78089	39.1161
69.2587	55.3667	1.36423	50.9181		1.58868	53.0895	4.09655	42.3818
70.9716	56.7361	1.55077	57.8803		1.53208	51.198	4.99915	51.7199
75.9947	60.7516	1.11626	41.6627		1.71321	57.2509	5.84957	60.5181
81.3233	65.0114	0.880469	32.8623		1.75849	58.7642	6.07343	62.8341
82.0579	65.5987	0.962082	35.9084		1.88302	62.9256	4.22285	43.6884
83.259	66.5589	1.03184	38.5119		2.27925	76.1665	5.42716	56.148
83.2838	66.5787	1.102	41.1307		2.24528	75.0315	5.7435	59.4207
85.4218	68.2879	1.15973	43.2854		2.15472	72.005	5.83631	60.3809
86.1606	68.8785	1.25304	46.768		2.08679	69.7352	5.7933	59.936
88.5092	70.7559	1.24052	46.3007		2.09811	70.1135	6.19837	64.1267
87.0274	69.5714	1.04221	38.899		2.08679	69.7352	6.37889	65.9943
86.4785	69.1325	0.820181	30.6121		1.89434	63.3039	7.06034	73.0445
82.1818	65.6977	1.31292	49.0028		1.9283	64.4388	7.37464	76.2961
70.4804	56.3434	2.15913	80.5864		1.98491	66.3304	7.59816	78.6086
79.5526	63.5959	1.86355	69.5543		1.9283	64.4388	8.09536	83.7525
80.2625	64.1634	1.87499	69.9815		2.55094	85.2459	5.86945	60.7238
81.2283	64.9355	1.94483	72.5881		2.49434	83.3544	5.9162	61.2074
84.7491	67.75	1.9202	71.6689		2.30189	76.9231	6.46252	66.8595
84.7656	67.7632	1.96698	73.4148		2.5283	84.4893	7.31158	75.6436
88.0758	70.4095	2.67927	100		2.99245	100	8.78412	90.8782
89.4874	71.5379	2.67877	99.9815		2.44906	81.8411	8.7554	90.581
94.2546	75.3489	2.18587	81.5847		2.13208	71.2484	9.66582	100
95.1379	76.055	2.02182	75.4616
95.3525	76.2266	1.96327	73.2762
95.3318	76.2101	1.90479	71.0938
96.405	77.068	1.61202	60.1664
104.235	83.3273	2.46307	91.9308
114.661	91.662	2.00327	74.7694
125.091	100	2.22184	82.927

## Sheet: Zwaagstra 1980
S	%S	AHP	%AHP		CV	%CV	AHP	%AHP
32.3233	46.5071	183.878	69.3455		61.7296	52.5829	266.578	105.433
32.413	46.6361	182.13	68.6863		69.98	59.6108	252.842	100
32.5011	46.7628	176.026	66.3846		64.7891	55.189	199.94	79.077
33.5695	48.3001	134.145	50.5898		63.5167	54.1052	208.971	82.6488
36.2763	52.1947	128.741	48.5521		61.5092	52.3952	198.24	78.4046
35.9967	51.7923	104.369	39.3607		63.0574	53.7139	181.107	71.6285
35.9967	51.7923	104.369	39.3607		63.4839	54.0773	180.195	71.2678
33.7759	48.597	205.56	77.5225		69.21	58.9549	202.505	80.0916
35.2177	50.6715	197.626	74.5304		72.05	61.3741	193.427	76.5013
36.3956	52.3663	208.873	78.772		71.1837	60.6362	183.561	72.5992
41.4723	59.6707	265.162	100		69.4622	59.1698	173.721	68.7072
47.4284	68.2404	256.062	96.5682		63.2983	53.9192	142.43	56.3319
44.4265	63.9212	194.411	73.318		65.9927	56.2144	130.659	51.6762
41.5397	59.7676	201.568	76.0172		70.262	59.851	125.135	49.4916
40.8991	58.846	178.091	67.1632		70.6833	60.21	119.727	47.3526
39.3639	56.637	177.32	66.8725		69.6652	59.3427	101.772	40.2513
39.1745	56.3645	152.942	57.6789		71.4923	60.899	79.2352	31.3379
42.6952	61.4302	150.97	56.9352		76.3388	65.0274	79.9892	31.6361
42.7002	61.4374	164.907	62.1912		76.7888	65.4108	99.7599	39.4555
43.4113	62.4604	133.502	50.3473		76.51	65.1732	105.164	41.5928
40.0683	57.6505	127.623	48.1301		76.5387	65.1977	130.343	51.5512
39.1641	56.3496	124.197	46.8384		76.7335	65.3636	176.2	69.688
39.1657	56.3519	128.553	48.4809		84.8536	72.2806	173.259	68.5248
39.5193	56.8607	107.624	40.588		81.8322	69.7068	148.17	58.6018
39.6936	57.1114	90.1906	34.0135		78.9286	67.2335	101.494	40.1415
43.1313	62.0576	108.259	40.8275		80.3609	68.4536	107.746	42.6142
43.6699	62.8325	99.5128	37.5291		82.92	70.6334	102.274	40.4498
43.7601	62.9624	99.5069	37.5269		88.0761	75.0255	124.601	49.2804
43.7601	62.9624	99.5069	37.5269		87.9274	74.8989	119.21	47.1482
42.218	60.7435	79.5728	30.0092		87.9756	74.94	161.475	63.864
45.0148	64.7676	73.2925	27.6407		89.9687	76.6378	159.617	63.1291
45.1076	64.9012	80.2551	30.2665		87.6229	74.6395	102.133	40.394
47.2818	68.0295	100.148	37.7686		86.1814	73.4116	87.7877	34.7204
47.8239	68.8094	100.984	38.0838		90.7572	77.3094	101.14	40.0012
47.2003	67.9122	124.543	46.9689		92.7544	79.0107	102.878	40.6889
46.4934	66.8951	167.273	63.0833		94.1734	80.2194	97.4402	38.538
49.4516	71.1514	107.846	40.6717		94.0575	80.1207	120.825	47.7868
49.9918	71.9286	103.455	39.0159		95.9122	81.7006	122.568	48.4762
50.896	73.2296	106.88	40.3076		95.9122	81.7006	122.568	48.4762
50.7217	72.9788	124.313	46.8821		96.511	82.2106	147.73	58.4278
54.4334	78.3192	151.074	56.9745		90.1502	76.7923	68.7839	27.2043
52.609	75.6943	99.7998	37.6374		91.8501	78.2404	59.7401	23.6275
53.3313	76.7336	99.7526	37.6196		92.4386	78.7417	75.9095	30.0225
54.5051	78.4224	99.676	37.5907		93.0076	79.2264	74.9932	29.6601
54.5051	78.4224	99.676	37.5907		95.2796	81.1617	67.7308	26.7878
56.3138	81.0247	107.398	40.5027		97.1241	82.7329	60.4813	23.9206
58.2146	83.7597	120.34	45.3835		98.1196	83.5809	58.6529	23.1975
58.4757	84.1354	93.319	35.1933		98.2786	83.7163	73.0366	28.8863
58.5648	84.2635	89.8289	33.877		98.2837	83.7207	77.5329	30.6646
56.7561	81.6612	82.1073	30.965		98.5944	83.9853	100.006	39.5526
55.9407	80.4879	74.3208	28.0285		99.4464	84.7111	97.2822	38.4755
54.4916	78.4029	62.2204	23.4651		100.444	85.5608	97.2523	38.4637
53.4971	76.9721	58.801	22.1756		99.8872	85.0866	108.96	43.094
52.8657	76.0636	60.5845	22.8481		99.8944	85.0927	115.254	45.5836
54.0436	77.7584	71.8315	27.0897		100.432	85.5503	86.4613	34.1958
49.5303	71.2646	75.6107	28.515		100.281	85.422	79.2715	31.3522
49.7093	71.5221	71.2436	26.868		101.977	86.8665	66.6308	26.3528
48.6318	69.9718	87.8645	33.1362		101.985	86.8735	73.8248	29.198
48.359	69.5793	82.6559	31.1719		101.725	86.6516	95.4153	37.7372
48.0866	69.1873	78.3183	29.5361		103.156	87.8708	100.768	39.8542
48.8032	70.2185	62.592	23.6052		103.427	88.1023	89.0693	35.2273
48.5311	69.827	59.1255	22.2979		106.292	90.5424	101.573	40.1727
49.8836	71.7729	53.8106	20.2935		106.285	90.5363	95.2786	37.6831
50.8771	73.2024	54.6168	20.5976		104.825	89.2927	64.7468	25.6077
57.0213	82.0427	66.4105	25.0453		106.257	90.5127	70.9989	28.0804
57.743	83.0811	64.6212	24.3705		107.248	91.3564	64.6742	25.5789
58.0164	83.4745	71.572	26.9918		107.813	91.8376	60.1609	23.7939
58.3788	83.9959	75.0326	28.297		108.515	92.4359	51.147	20.2289
59.7332	85.9446	74.9442	28.2636		110.094	93.7808	60.9918	24.1225
61.361	88.2867	81.8065	30.8516		110.107	93.7922	72.682	28.7461
63.1706	90.8903	92.1412	34.7491		109.406	93.1948	82.5951	32.6667
65.4197	94.1264	69.3462	26.1524		109.834	93.5599	83.4816	33.0173
65.3288	93.9955	67.61	25.4976		113.535	96.7118	78.8743	31.1951
68.0529	97.9151	110.115	41.5275		117.395	100	89.5499	35.4174
69.502	100	122.215	46.0909

## Sheet: Cullheim 1981
CV	%CV	S (axon D)	%S		S (Soma D)	%s	CV	%CV
70.3404	62.8312	2.29994	50.2833		44.1609	67.2682	69.2532	62.7742
77.6461	69.357	2.30385	50.3688		47.5638	72.4516	69.5735	63.0645
65.7995	58.775	2.69953	59.0195		48.562	73.972	65.6704	59.5265
76.6398	68.4582	2.70827	59.2106		47.5578	72.4424	76.4555	69.3026
78.7459	70.3394	2.80453	61.3151		49.1805	74.9142	76.8332	69.645
80.1172	71.5643	3.07744	67.2817		51.0665	77.7871	75.4821	68.4203
77.0191	68.7969	3.29451	72.0276		53.1557	80.9695	81.2211	73.6224
70.4347	62.9155	3.19934	69.9469		50.4607	76.8643	109.695	99.4325
85.2221	76.1242	3.58853	78.4556		50.5712	77.0327	103.025	93.3863
81.8936	73.1511	3.7715	82.456		53.7084	81.8113	107.87	97.7781
94.8875	84.7578	3.57478	78.1551		53.5607	81.5864	97.122	88.0357
108.775	97.1627	3.69094	80.6946		54.14	82.4688	93.2324	84.5099
103.09	92.0843	3.87449	84.7076		56.0767	85.4188	93.8151	85.0381
100.716	89.9645	3.97754	86.9605		56.0853	85.432	83.9223	76.0709
94.1151	84.0679	3.99053	87.2446		56.7706	86.4759	78.5239	71.1775
100.699	89.9493	4.0857	89.3252		57.243	87.1954	77.2183	69.9941
110.836	99.004	4.07184	89.0222		56.0678	85.4054	103.923	94.2003
100.921	90.1471	4.17673	91.3154		58.2186	88.6816	99.1223	89.8488
103.262	92.2381	4.27862	93.5431		59.6839	90.9135	99.9353	90.5857
99.9629	89.2914	4.27373	93.4362		60.7318	92.5097	99.0412	89.7754
98.2799	87.788	4.48477	98.0501		62.0921	94.5819	100.073	90.7103
106.044	94.723	4.57396	100		61.5609	93.7726	108.907	98.7181
111.951	100	4.47574	97.8527		64.3869	98.0773	110.321	100
109.844	98.1179	4.38518	95.8727		65.6491	100	103.829	94.1151

## Sheet: Fleshman 1981
R	%R	Ith	%Ith		CV	%CV	R	%R
1.272	47.2127	26.0223	81.8616		114.423	97.0306	0.458801	17.3639
1.032	38.3047	26.7279	84.0812		108.486	91.9963	0.754912	28.5706
0.973333	36.1271	25.661	80.7251		108.598	92.0915	0.647374	24.5007
0.930667	34.5435	25.8557	81.3376		107.247	90.9457	0.637098	24.1118
0.872	32.3659	25.1204	79.0245		106.464	90.2819	0.705271	26.6919
0.909333	33.7516	24.7926	77.9932		106.399	90.2264	0.490088	18.548
0.872	32.3659	23.5952	74.2265		104.199	88.3607	0.337692	12.7804
0.888	32.9598	22.2042	69.8507		104.005	88.1962	0.34251	12.9628
1.144	42.4617	23.2244	73.06		102.943	87.2956	0.337231	12.763
1.10667	41.076	21.165	66.5814		102.452	86.8793	0.390841	14.7919
1.064	39.4924	20.5639	64.6906		101.691	86.2341	0.307432	11.6352
1.24533	46.2229	20.383	64.1215		101.695	86.2377	0.278094	10.5248
1.08	40.0863	19.5045	61.3578		100.9	85.5631	0.434281	16.4359
0.861333	31.97	20.0796	63.1669		100.9	85.5631	0.434281	16.4359
0.824	30.5843	19.2801	60.6519		99.3285	84.2306	0.609744	23.0766
0.872	32.3659	16.8976	53.157		99.3285	84.2306	0.609744	23.0766
1.18667	44.0454	18.5867	58.4707		101.625	86.1783	0.762176	28.8455
1.13333	42.0658	17.6531	55.5335		100.467	85.1963	0.751971	28.4593
1.224	45.4311	16.9326	53.2671		99.2759	84.1859	0.306546	11.6016
1.272	47.2127	16.7385	52.6563		96.1843	81.5642	0.305412	11.5587
1.18133	43.8474	15.8674	49.916		96.2738	81.6402	0.354345	13.4107
0.882667	32.7619	14.9756	47.1107		95.101	80.6456	0.446824	16.9107
0.893333	33.1578	14.5125	45.6537		94.2236	79.9016	0.500292	18.9342
1.19733	44.4413	13.4817	42.4111		94.311	79.9758	0.563894	21.3413
1.29333	48.0045	13.9554	43.9014		93.1496	78.9908	0.578138	21.8804
1.21867	45.2331	12.4228	39.08		94.1029	79.7993	0.666507	25.2248
0.989333	36.721	10.9411	34.4189		93.129	78.9734	0.71994	27.2471
1.112	41.274	6.84191	21.5235		96.1155	81.506	0.779715	29.5093
0.643918	23.9002	31.7881	100		95.9109	81.3325	0.857879	32.4676
0.599553	22.2535	25.6232	80.6061		98.6239	83.6331	0.805085	30.4695
0.555944	20.6349	22.1193	69.5836		80.0706	67.8999	0.82273	31.1373
0.782862	29.0574	20.8715	65.6583		117.925	100	0.751542	28.4431
0.909909	33.773	18.0775	56.8688		116.981	99.2	0.717574	27.1575
0.62464	23.1847	13.9299	43.8211		105.849	89.76	0.60467	22.8845
0.958591	35.5799	14.4388	45.422		105	89.04	0.556224	21.051
1.13575	42.1556	13.0482	41.0473		100.849	85.52	0.623188	23.5854
0.601622	22.3303	7.90621	24.8716		100.849	85.52	0.623188	23.5854
0.722323	26.8104	7.77291	24.4523		108.868	92.32	0.948151	35.884
0.630854	23.4153	19.4818	61.2864		105.094	89.12	0.918558	34.764
0.950237	35.2699	17.6979	55.6746		95.4717	80.96	1.1344	42.9329
0.730114	27.0996	14.9648	47.0766		95.1887	80.72	1.13919	43.114
0.590008	21.8993	13.874	43.6453		83.2075	70.56	0.63484	24.0264
0.621897	23.0829	8.38468	26.3768		109.28	92.6694	0.644462	24.3905
0.774207	28.7362	9.59676	30.1898		107.36	91.0413	0.599884	22.7034
0.816972	30.3235	10.0825	31.7177		108.24	91.7875	0.742923	28.1169
0.919874	34.1429	10.0775	31.702		111.12	94.2298	1.2989	49.1586
0.944922	35.0726	11.1128	34.959		107.36	91.0413	0.829587	31.3968
0.872286	32.3766	11.1164	34.9702		107.28	90.9734	0.88103	33.3437
0.866774	32.172	11.7874	37.081		107.36	91.0413	0.928597	35.144
0.849058	31.5144	12.337	38.8101		106.4	90.2272	0.801357	30.3284
0.946054	35.1146	12.5152	39.3707		106.16	90.0237	1.02301	38.7173
0.999744	37.1074	11.537	36.2934		104.24	88.3955	0.974474	36.8803
1.04866	38.923	12.1443	38.204		102.64	87.0387	0.906302	34.3002
0.807966	29.9892	13.9244	43.8037		102.56	86.9709	0.874577	33.0995
0.959883	35.6279	14.6487	46.0822		101.12	85.7498	0.960945	36.3682
1.02661	38.1047	14.8283	46.6474		100.96	85.6141	0.972742	36.8147
1.31042	48.6386	13.9608	43.9184		100	84.8	1.21382	45.9386
1.23562	45.8622	11.2816	35.4899		101.12	85.7498	1.68966	63.9474
1.69161	62.7874	13.7593	43.2845		99.04	83.9859	0.940045	35.5772
1.09294	40.5666	8.991	28.2841		99.04	83.9859	0.837075	31.6802
0.982781	36.4778	6.34782	19.9692		97.04	82.2899	0.74889	28.3427
1.22621	45.5132	4.13661	13.0131		96.48	81.815	0.558495	21.137
1.39258	51.6884	5.00938	15.7587		94.08	79.7798	1.04436	39.5251
1.48971	55.2936	4.09855	12.8933		101.313	85.9131	1.61962	61.2967
1.48963	55.2903	3.37486	10.6167		100.291	85.0466	1.4602	55.2631
1.47381	54.7035	1.66267	5.23048		100.266	85.0257	1.1673	44.178
1.82923	67.8955	2.29219	7.21083		96.5541	81.8779	0.994198	37.6268
1.92723	71.5329	3.61829	11.3825		91.5911	77.6692	0.933544	35.3312
1.9897	73.8514	3.95382	12.438		91.6259	77.6987	1.34778	51.0087
1.90273	70.6235	4.53677	14.2719		93.7349	79.4872	1.4449	54.6842
1.75417	65.1094	7.02113	22.0873		95.3326	80.8421	1.45812	55.1846
1.70378	63.2391	7.27898	22.8984		97.3678	82.5679	1.67655	63.4511
1.94982	72.3713	6.77857	21.3242		88.8147	75.3149	1.89473	71.7084
2.24694	83.3995	6.80984	21.4226		86.6259	73.4587	1.84778	69.9319
2.36475	87.7722	8.13803	25.6009		85.365	72.3895	1.84307	69.7535
2.69419	100	2.38324	7.49725		73.5113	62.3375	1.78372	67.5073
					74.8622	63.4831	1.8596	70.379
					74.5499	63.2183	2.14399	81.142
					83.7785	71.0442	1.96375	74.3207
					88.4233	74.983	2.23766	84.6871
					85.4321	72.4465	2.64226	100

## Sheet: Kernell 1981
CV	%CV	1/R	R	%R		CV	%CV	S	%S		S	%S	1/R	R	%R			CV	%CV	Ith	%Ith
61.9057	52.4688	1.31109	7.62725	94.6617		61.9918	52.6859	41.3197	60.0942		28.1513	41.3457	2.71423	3.68429	52.47			70.4717	61.2295	9.30578	23.2
63.8853	54.1466	1.2411	8.05738	100		61.854	52.5688	34.9189	50.7851		29.7664	43.7178	2.39935	4.16779	59.3558			78.3019	68.0328	5.37154	13.3916
63.8422	54.1101	1.4595	6.85164	85.0357		63.8475	54.263	33.4195	48.6043		28.4486	41.7823	1.71974	5.81484	82.8124			80.0943	69.5902	7.31086	18.2265
64.2747	54.4767	1.63558	6.11403	75.8811		64.1056	54.4824	32.5535	47.3449		28.7187	42.179	1.6603	6.02302	85.7771			83.2075	72.2951	4.17882	10.4181
65.0641	55.1457	2.03729	4.90848	60.9191		62.9548	53.5043	32.1324	46.7325		34.7852	51.0888	1.79353	5.57558	79.4049			83.0189	72.1311	6.6148	16.4912
63.3408	53.6851	2.70136	3.70184	45.9435		64.194	54.5575	42.9699	62.4942		34.5998	50.8166	1.99278	5.01812	71.4658			86.0377	74.7541	4.35984	10.8694
62.3187	52.8188	2.8563	3.50103	43.4513		65.1729	55.3894	41.7625	60.7382		38.6923	56.8272	2.50042	3.99933	56.9567			87.1698	75.7377	4.84134	12.0698
66.4452	56.3163	4.97611	2.0096	24.9412		66.3729	56.4094	43.4343	63.1696		38.785	56.9633	2.37213	4.21563	60.0371			85.8491	74.5902	6.114	15.2426
71.3937	60.5104	6.32215	1.58174	19.631		68.2568	58.0104	34.2954	49.8782		42.0112	61.7017	1.97109	5.07332	72.252			82.1698	71.3934	18.1124	45.1556
72.3203	61.2958	3.36184	2.97456	36.9173		70.1561	59.6246	32.1137	46.7052		43.2822	63.5683	1.42415	7.02171	100			88.1132	76.5574	15.7458	39.2555
72.0074	61.0306	2.90462	3.44279	42.7285		71.6319	60.8788	32.04	46.598		41.7196	61.2734	2.84961	3.50925	49.9772			88.8679	77.2131	12.5279	31.2329
73.2834	62.1121	2.76963	3.61059	44.811		70.0945	59.5722	35.5887	51.7592		38.9003	57.1327	6.33724	1.57798	22.4728			87.9245	76.3934	9.41558	23.4737
71.3397	60.4647	2.5706	3.89014	48.2805		70.1006	59.5774	36.2166	52.6724		43.0493	63.2263	13.2268	0.75604	10.7672			89.5283	77.7869	8.23894	20.5403
70.0332	59.3573	2.09668	4.76944	59.1935		68.9414	58.5923	36.1407	52.5621		44.5181	65.3834	7.09125	1.41019	20.0833			90.9434	79.0164	10.8619	27.0795
69.3	58.7359	1.88576	5.30289	65.8141		71.307	60.6028	39.2639	57.1044		45.9506	67.4874	6.66603	1.50014	21.3644			91.9811	79.918	11.1491	27.7954
70.4282	59.6921	1.72655	5.7919	71.8832		74.91	63.6649	34.1286	49.6357		44.1835	64.8921	4.99281	2.00288	28.5241			90.9434	79.0164	13.297	33.1503
74.6478	63.2685	2.37688	4.2072	52.2155		77.0061	65.4464	32.9507	47.9226		41.5185	60.9779	4.04792	2.47041	35.1824			91.9811	79.918	21.0841	52.5642
77.2533	65.4768	2.44041	4.09767	50.8561		78.7703	66.9457	35.9572	52.2952		45.5533	66.9039	3.10745	3.21808	45.8304			94.9057	82.459	13.6673	34.0735
78.022	66.1283	2.28852	4.36964	54.2315		76.9661	65.4123	39.2478	57.0809		49.2599	72.3477	6.10017	1.6393	23.3461			95.8491	83.2787	11.325	28.2341
78.1852	66.2667	2.02673	4.93405	61.2364		76.9661	65.4123	39.2478	57.0809		49.3187	72.4341	9.7972	1.0207	14.5363			95.1887	82.7049	7.13995	17.8004
77.3197	65.5331	3.08737	3.239	40.1992		77.2069	65.617	42.0908	61.2157		51.0309	74.9489	7.65932	1.3056	18.5938			97.9245	85.082	3.71753	9.26807
77.7565	65.9032	3.60273	2.77567	34.4489		76.9018	65.3577	43.8768	63.8132		54.1684	79.5569	6.309	1.58504	22.5734			99.2453	86.2295	4.39292	10.9519
81.1682	68.7949	3.46853	2.88306	35.7816		71.934	61.1356	42.7562	62.1834		51.1078	75.0618	9.28991	1.07644	15.3301			105	91.2295	7.77398	19.3811
81.3169	68.921	4.04659	2.47122	30.6702		71.9473	61.1469	44.3749	64.5376		51.9967	76.3673	9.8758	1.01258	14.4207			100	86.8852	12.6685	31.5834
82.6194	70.0249	4.8807	2.04889	25.4287		71.1787	60.4937	47.8015	69.5211		52.8964	77.6886	8.88652	1.1253	16.026			99.0566	86.0656	14.8159	36.9371
85.0026	72.0448	4.0246	2.48472	30.8378		69.9024	59.409	47.3899	68.9226		54.1396	79.5146	9.86961	1.01321	14.4297			101.887	88.5246	17.1398	42.7307
86.4121	73.2394	3.99605	2.50247	31.0581		80.1094	68.0838	49.4714	71.9498		55.293	81.2086	11.0583	0.904295	12.8786			102.736	89.2623	15.9668	39.8064
86.4505	73.272	4.51289	2.21588	27.5012		83.3414	70.8306	42.8157	62.27		56.0683	82.3473	17.1442	0.583288	8.30692			108.113	93.9344	11.2653	28.0852
86.4397	73.2628	3.083	3.2436	40.2563		82.2662	69.9168	38.8072	56.4401		60.1456	88.3355	27.2619	0.366812	5.22398			108.962	94.6721	13.0144	32.4459
87.4364	74.1076	3.13555	3.18924	39.5816		86.2796	73.3278	42.2499	61.4471		59.6359	87.5869	18.2111	0.549114	7.82024			109.811	95.4098	17.1986	42.8773
88.3851	74.9116	3.75018	2.66654	33.0944		85.1952	72.4061	40.9793	59.5991		58.3067	85.6348	15.5567	0.64281	9.15462			114.811	99.7541	15.1288	37.7172
90.385	76.6067	4.71214	2.12218	26.3383		85.1869	72.399	40.181	58.4381		61.7878	90.7474	15.816	0.632272	9.00454			105	91.2295	20.7285	51.6777
93.0639	78.8773	4.79756	2.08439	25.8694		85.0548	72.2868	38.8851	56.5534		66.0742	97.0428	15.6582	0.638644	9.09528			98.6792	85.7377	23.4866	58.5537
93.4621	79.2147	3.8554	2.59376	32.1912		86.6088	73.6075	39.3086	57.1694		59.5862	87.5139	9.8539	1.01483	14.4527			105.094	91.3115	40.1112	100
87.5382	74.1939	6.09608	1.6404	20.359		88.1797	74.9426	38.708	56.2958		60.7463	89.2178	9.93737	1.0063	14.3313			102.17	88.7705	30.8722	76.9665
86.4486	73.2704	6.34349	1.57642	19.5649		90.2027	76.6619	42.5177	61.8366		64.3178	94.4632	9.92699	1.00735	14.3463			108.302	94.0984	32.5956	81.263
90.7394	76.9071	13.7426	0.727666	9.03105		88.3865	75.1184	46.918	68.2362		68.0877	100	7.29409	1.37097	19.5248			115.094	100	27.9846	69.7675
88.5956	75.0901	10.1666	0.983615	12.2076		88.1529	74.9198	48.1657	70.0508
89.3241	75.7076	8.4413	1.18465	14.7027		91.1253	77.446	46.6036	67.779
91.3284	77.4063	7.12936	1.40265	17.4083		92.4144	78.5416	48.1534	70.033
94.3487	79.9662	6.37685	1.56817	19.4626		93.3302	79.32	49.5389	72.0479
94.4796	80.0771	6.58758	1.51801	18.84		93.2027	79.2116	49.7563	72.3641
93.8278	79.5247	7.93459	1.2603	15.6416		91.4362	77.7102	52.9024	76.9397
93.5244	79.2676	9.25413	1.0806	13.4113		89.8092	76.3275	53.9587	78.476
95.4403	80.8913	9.26539	1.07929	13.395		96.2597	81.8097	40.2424	58.5274
95.5953	81.0227	10.2131	0.979138	12.1521		94.9849	80.7262	44.9917	65.4347
98.2763	83.2951	4.81327	2.07759	25.7849		98.4617	83.6811	43.6272	63.4502
98.5433	83.5213	5.05401	1.97863	24.5567		100.125	85.0946	44.3929	64.5637
98.6368	83.6006	6.55129	1.52642	18.9443		100.435	85.358	47.2974	68.788
98.6836	83.6402	7.45886	1.34069	16.6393		100.591	85.4906	48.8736	71.0804
100.705	85.3536	7.46793	1.33906	16.619		98.1003	83.374	48.1379	70.0105
100.794	85.4289	6.72129	1.48781	18.4652		97.9769	83.2691	49.4177	71.8718
102.81	87.1375	5.91065	1.69186	20.9977		95.7068	81.3398	51.0715	74.2769
101.783	86.2668	8.57693	1.16592	14.4702		93.7493	79.6761	52.7797	76.7614
98.269	83.2889	9.43336	1.06007	13.1565		93.4072	79.3854	58.4919	85.069
97.8359	82.9218	11.2722	0.887137	11.0102		96.5326	82.0416	53.8199	78.2742
95.8415	81.2314	14.5928	0.685269	8.50487		97.3392	82.7271	53.7	78.0997
97.923	82.9956	14.3766	0.695573	8.63275		98.3102	83.5523	55.9743	81.4075
111.425	94.439	28.1662	0.355035	4.40633		98.2984	83.5424	54.6444	79.4734
102.879	87.1963	20.1047	0.497397	6.17319		99.6696	84.7077	54.2832	78.948
101.841	86.3167	20.0924	0.4977	6.17694		100.365	85.2988	54.4	79.1178
101.296	85.8548	18.5219	0.539902	6.70072		99.9663	84.9599	56.4608	82.115
100.13	84.866	17.6302	0.567208	7.03961		100.397	85.3256	57.9602	84.2956
101.236	85.8039	15.749	0.634961	7.8805		94.3953	80.2251	68.7582	100
105.191	89.1555	17.1182	0.584172	7.25015		100.471	85.3886	67.2488	97.8048
102.582	86.944	12.8699	0.777005	9.6434		102.288	86.9326	65.5014	95.2634
101.033	85.6318	12.8582	0.777714	9.6522		110.56	93.9632	65.6172	95.4318
100.306	85.0152	10.0778	0.992277	12.3151		117.663	100	62.7891	91.3188
103.017	87.3134	10.259	0.974757	12.0977		113.315	96.3047	60.776	88.3909
104.027	88.1692	9.2382	1.08246	13.4344		110.19	93.6487	58.4398	84.9933
105.861	89.7236	8.59716	1.16317	14.4361		102.652	87.2425	57.9532	84.2855
106.732	90.4621	10.1154	0.988587	12.2693		103.659	88.0984	58.4591	85.0213
106.603	90.3528	10.28	0.972758	12.0729		106.588	90.5872	59.4815	86.5082
108.787	92.2037	10.2926	0.971576	12.0582		106.284	90.3291	58.5791	85.1958
108.711	92.1395	17.0136	0.587765	7.29475		107.166	91.0789	57.8132	84.082
110.04	93.2655	20.8513	0.479587	5.95214		105.242	89.4437	57.0655	82.9945
111.063	94.1322	16.3587	0.611295	7.58677		106.117	90.1871	56.4426	82.0886
114.348	96.9165	16.3873	0.610227	7.57352		105.516	89.6769	55.1033	80.1407
116.793	98.989	14.7669	0.67719	8.4046		101.894	86.5985	52.756	76.7269
117.983	99.9978	14.7759	0.676779	8.39949		103.586	88.0363	50.716	73.7599
117.986	100	10.5119	0.951306	11.8067		105.037	89.2692	50.9344	74.0775
115.682	98.0471	8.64303	1.157	14.3595		110.305	93.7463	54.4913	79.2506
115.501	97.8939	7.96925	1.25482	15.5736		108.142	91.9086	50.7042	73.7428
116.894	99.0749	6.61837	1.51095	18.7523		108.133	91.9006	49.8252	72.4644
						107.974	91.7651	48.9619	71.2088
						109.779	93.2999	48.214	70.1211
			0.355035
			8.05738

[truncated: 11 more sheets: Burke 1982, Gustafsson 1984a, Gustafsson 1984b, Gustafsson 1985, Zengel 1985, Munson 1986, Foehering 1987, Pinter 1989 (W), Kernell 1989a (TA), Sasaki 1990, Krawitz 2001]
