# Supplementary material for: Mathematical Relationships between Spinal Motoneuron Properties
Source: bioRxiv preprint, doi:10.1101/2021.08.05.455188, version 5 (2022-06-01)
Supplement: data for Table 5 [file 455188_file05.xlsx]

## Sheet: Wuerker 1965
CV	%CV	Ftet	%Ftet
64.3838	73.8002	4.3228	5.01236
69.0788	79.182	7.22075	8.37259
70.024	80.2653	10.1582	11.7786
72.5119	83.1171	5.5004	6.37781
73.968	84.7861	4.64296	5.3836
79.1794	90.7598	5.85127	6.78465
77.6214	88.9739	7.55188	8.75654
76.2782	87.4343	11.7765	13.6551
76.5161	87.707	23.1425	26.8341
78.7145	90.2269	27.3298	31.6895
79.5478	91.1821	27.3211	31.6793
80.4985	92.2718	32.3637	37.5263
82.4633	94.524	26.8693	31.1555
82.289	94.3242	39.9238	46.2924
83.4392	95.6426	41.5959	48.2312
84.4874	96.8441	44.1112	51.1477
87.2406	100	61.3454	71.1311
85.9106	98.4755	70.6225	81.8881
81.993	93.9848	86.2427	100

## Sheet: McPhedran 1965
CV	%CV	Ftet	%Ftet
57.6383	79.6279	7.3721	27.0268
58.586	80.9372	7.10792	26.0583
62.9505	86.9667	6.69266	24.536
63.2102	87.3255	7.72325	28.3142
65.6323	90.6717	10.4173	38.1908
70.8464	97.8751	14.2546	52.2588
69.4819	95.9899	18.6505	68.3746
72.3845	100	27.277	100

## Sheet: Knott 1971
CV	%CV	Ftw	%Ftw
69	70.4082	0.28	1.27273
98	100	22	100
90	91.8367	1.6	7.27273
90	91.8367	0.44	2
86	87.7551	16	72.7273
89	90.8163	2	9.09091

## Sheet: Bagust 1973
CV	%CV	Ftet	%Ftet
69.233	62.5573	0.067647	1.46128
69.6305	62.9165	0.14243	3.07671
74.493	67.3102	0.0913487	1.97328
78.9542	71.3411	0.084364	1.8224
80.6012	72.8293	0.0958934	2.07145
79.8102	72.1147	0.713474	15.4122
83.2359	75.21	1.17047	25.2839
90.0924	81.4054	3.33207	71.978
95.6821	86.4561	4.62929	100
100.243	90.5772	3.87554	83.7177
98.6012	89.0938	3.60656	77.9074
97.9167	88.4752	2.60938	56.3666
101.417	91.6378	2.97177	64.1949
104.244	94.1926	2.77856	60.0214
108.689	98.2091	2.16819	46.8363
110.671	100	2.68205	57.9365
109.664	99.0895	0.639816	13.821
107.517	97.1497	0.906801	19.5883
106.469	96.2032	1.41956	30.6648
105.73	95.5354	1.8263	39.4511
104.53	94.4508	1.79857	38.8519
103.568	93.5812	2.18702	47.243
103.021	93.0875	2.15529	46.5576
102.043	92.2035	2.21438	47.8342
99.5025	89.9081	1.55472	33.5844
101.442	91.6606	1.2271	26.5073
101.435	91.6546	1.1439	24.7101
105.256	95.1066	1.21486	26.2429
105.466	95.2964	1.11696	24.1281
104.596	94.5109	0.36294	7.84008
102.818	92.9038	0.795216	17.1779
101.72	91.9116	0.730126	15.7719
101.928	92.1002	0.661927	14.2987
100.389	90.7093	0.574289	12.4056
98.6066	89.0986	0.381493	8.24084
98.5906	89.0842	0.322335	6.96295
98.576	89.071	0.276203	5.96642
97.6854	88.2662	0.226702	4.89712
97.4541	88.0572	0.196958	4.2546
98.4909	88.9941	0.112446	2.42902
94.3103	85.2165	0.235616	5.08967
94.7636	85.6261	0.282931	6.11175
98.3832	88.8968	1.14023	24.6308
98.3673	88.8824	0.96342	20.8114
98.685	89.1695	0.873531	18.8696
97.377	87.9875	0.872328	18.8437
96.5196	87.2128	1.01709	21.9708
96.8133	87.4783	0.716236	15.4718
95.3883	86.1907	0.657384	14.2005
95.5997	86.3816	0.612954	13.2408
92.2339	83.3404	0.702853	15.1827
90.2386	81.5375	0.493757	10.6659
90.535	81.8054	0.357606	7.72485
90.4194	81.7009	0.333322	7.20028
92.3748	83.4677	0.311365	6.72598
88.5371	80.0001	0.244263	5.27645
88.1529	79.6529	0.422169	9.11951
86.494	78.1539	0.327319	7.07061
85.0756	76.8723	0.322274	6.96162
84.6197	76.4603	0.260947	5.63688
85.3813	77.1486	0.257516	5.56275
85.372	77.1402	0.233409	5.04199
84.496	76.3486	0.223575	4.82957
87.5135	79.0752	0.155692	3.3632
88.7033	80.1502	0.141295	3.0522
91.3087	82.5044	0.126631	2.73542
89.106	80.5141	3.14683	67.9765

## Sheet: Proske 1974
CV	%CV	Ftet	%Ftet
57.8561	58.6176	2.68333	2.37294
63.077	63.9072	2.02958	1.79482
72.8691	73.8282	4.09335	3.61986
74.6393	75.6217	2.62286	2.31947
83.9645	85.0696	3.92597	3.47185
83.6876	84.7891	6.92828	6.12688
91.7131	92.9202	14.222	12.5769
92.8323	94.0541	14.619	12.928
93.6736	94.9065	16.8904	14.9367
97.4183	98.7005	33.1262	29.2945
97.8001	99.0873	42.5319	37.6122
98.6448	99.9432	48.5628	42.9455
97.1551	98.4338	50.7905	44.9155
96.8894	98.1646	65.8231	58.2092
96.8894	98.1646	65.8231	58.2092
95.863	97.1247	65.0519	57.5272
96.1504	97.416	73.328	64.846
90.9661	92.1633	113.08	100
90.9412	92.1381	86.3879	76.3953
94.123	95.3618	98.8538	87.4192
95.9808	97.2441	91.3699	80.801
97.854	99.142	100.428	88.811
98.7009	100	108.714	96.1391

## Sheet: Stephens 1975
CV	%CV	Ftw	%Ftw		CV	%CV	Ftw	%Ftw
74.1279	68.109	0.0861954	6.17053		84.1859	67.7963	0.0339605	3.13022
74.8256	68.75	0.080025	5.72881		92.083	74.1559	0.0721784	6.65287
90.6977	83.3333	0.0458448	3.28193		92.0907	74.1621	0.0867068	7.99199
83.7209	76.9231	0.107711	7.71075		96.6644	77.8454	0.041636	3.8377
84.2442	77.4038	0.144974	10.3784		101.413	81.6695	0.133013	12.2601
88.9535	81.7308	0.162061	11.6016		102.964	82.9185	0.1959	18.0566
90.1744	82.8526	0.80025	57.2881		103.374	83.2487	0.368444	33.9605
91.9186	84.4551	0.6404	45.8448		103.785	83.5796	0.707225	65.1867
94.186	86.5385	0.572881	41.0113		104.073	83.812	0.721784	66.5287
100.291	92.1474	0.531871	38.0755		108.261	87.1843	0.326043	30.0522
101.163	92.9487	0.594557	42.563		110.206	88.7504	0.613212	56.5213
100.988	92.7885	0.493797	35.3498		111.363	89.6822	0.707225	65.1867
100.988	92.7885	0.441734	31.6228		111.167	89.5243	0.638719	58.8724
105.174	96.6346	1.39689	100		110.371	88.8837	0.326043	30.0522
108.837	100	0.316228	22.638		114.222	91.9846	0.451718	41.636
					118.287	95.2584	1.08492	100
					118.322	95.2865	0.250167	23.0585
					119.965	96.61	0.339605	31.3022
					124.175	100	0.260573	24.0177

## Sheet: Freund 1975
Raw data	CV norm	%CV	Fth	%Fth
0.137756	0.862244	97.0885	601.587	100
0.137756	0.862244	97.0885	601.587	100
0.111898	0.888102	100	501.587	83.3773
0.204481	0.795519	89.5752	446.032	74.1425
0.172584	0.827416	93.1668	401.587	66.7546
0.191557	0.808443	91.0305	396.825	65.9631
0.200025	0.799975	90.077	401.587	66.7546
0.216912	0.783088	88.1755	401.587	66.7546
0.250651	0.749349	84.3765	395.238	65.6992
0.267538	0.732462	82.4751	395.238	65.6992
0.208167	0.791833	89.1602	344.444	57.2559
0.233513	0.766487	86.3062	347.619	57.7836
0.210052	0.789948	88.948	301.587	50.1319
0.245944	0.754056	84.9065	303.175	50.3958
0.239569	0.760431	85.6243	295.238	49.0765
0.248013	0.751987	84.6736	295.238	49.0765
0.250107	0.749893	84.4378	292.063	48.5488
0.256473	0.743527	83.721	298.413	49.6042
0.256481	0.743519	83.72	300	49.8681
0.3008	0.6992	78.7297	298.413	49.6042
0.355673	0.644327	72.5511	296.825	49.3404
0.336592	0.663408	74.6996	280.952	46.7018
0.387226	0.612774	68.9982	276.19	45.9103
0.247753	0.752247	84.7028	246.032	40.8971
0.279432	0.720568	81.1358	249.206	41.4248
0.285773	0.714227	80.4218	250.794	41.6887
0.334347	0.665653	74.9524	255.556	42.4802
0.3301	0.6699	75.4306	250.794	41.6887
0.401893	0.598107	67.3467	255.556	42.4802
0.43353	0.56647	63.7844	250.794	41.6887
0.302366	0.697634	78.5534	195.238	32.4538
0.367827	0.632173	71.1825	200	33.2454
0.378364	0.621636	69.996	196.825	32.7177
0.395242	0.604758	68.0956	195.238	32.4538
0.41635	0.58365	65.7188	195.238	32.4538
0.42481	0.57519	64.7662	198.413	32.9815
0.469146	0.530854	59.774	200	33.2454
0.509243	0.490757	55.2591	198.413	32.9815
0.367676	0.632324	71.1995	171.429	28.496
0.403443	0.596557	67.1722	149.206	24.8021
0.424559	0.575441	64.7945	150.794	25.066
0.449889	0.550111	61.9424	150.794	25.066
0.466784	0.533216	60.04	152.381	25.3298
0.502659	0.497341	56.0004	150.794	25.066
0.606081	0.393919	44.3552	149.206	24.8021
0.411618	0.588382	66.2517	98.4127	16.3588
0.468602	0.531398	59.8353	96.8254	16.095
0.479156	0.520844	58.6469	96.8254	16.095
0.504494	0.495506	55.7939	98.4127	16.3588
0.517159	0.482841	54.3678	98.4127	16.3588
0.52138	0.47862	53.8924	98.4127	16.3588
0.506663	0.493337	55.5496	109.524	18.2058
0.517226	0.482774	54.3603	111.111	18.4697
0.591037	0.408963	46.0491	98.4127	16.3588
0.603694	0.396306	44.624	96.8254	16.095
0.607916	0.392084	44.1486	96.8254	16.095
0.607983	0.392017	44.1411	109.524	18.2058
0.669138	0.330862	37.255	98.4127	16.3588
0.578364	0.421636	47.4761	96.8254	16.095
0.557147	0.442853	49.8651	76.1905	12.6649
0.493705	0.506295	57.0087	53.9683	8.97098
0.508464	0.491536	55.3468	50.7937	8.44327
0.512644	0.487356	54.8762	42.8571	7.12401

## Sheet: Jami 1975
CV	%CV	Ftet	%Ftet		CV	%CV	Ftet	%Ftet		CV	%CV	Ftet	%Ftet		CV	%CV	Ftet	%Ftet
64.3966	67.8274	1.08687	1.54401		79.5371	72.6599	1.14972	1.98895		76.2021	71.6107	1.97108	5.82795		59.8573	66.7294	3.84438	17.9804
69.593	73.3006	2.11503	3.00464		84.0892	76.8184	2.252	3.89583		80.4842	75.6348	3.74091	11.0608		64.5674	71.9803	6.78809	31.7484
74.5561	78.5281	5.16659	7.33972		88.9804	81.2866	8.87314	15.35		86.0619	80.8764	5.46186	16.1492		69.8251	77.8416	8.82996	41.2983
79.4789	83.7132	17.0975	24.289		93.933	85.8111	13.238	22.9009		91.2988	85.7978	9.89182	29.2474		74.8993	83.4984	13.008	60.8393
84.7088	89.2217	25.8349	36.7013		98.9515	90.3956	23.0123	39.8099		96.0046	90.22	22.485	66.4821		80.1592	89.3621	15.9923	74.7969
89.4173	94.181	43.1609	61.3149		104.387	95.3612	48.7159	84.2755		101.542	95.4238	27.0959	80.115		85.1512	94.9272	19.6691	91.9938
94.9419	100	70.3922	100		109.465	100	57.8055	100		106.412	100	33.8212	100		89.7015	100	21.3809	100

## Sheet: Appelberg 1976
CV	%CV	Ftet	%Ftet
47.7401	53.481	0.608114	2.09184
54.3785	60.9177	1.37706	4.73691
61.4407	68.8291	3.21929	11.074
63.5593	71.2025	3.14158	10.8067
64.548	72.3101	3.78345	13.0146
67.3729	75.4747	3.05902	10.5227
71.4689	80.0633	8.56305	29.4558
77.1186	86.3924	15.4953	53.3019
87.8531	98.4177	21.0519	72.416
89.2655	100	29.0708	100

## Sheet: Dum 1980
1/R	R	%R	Ftet	%Ftet
0.459791	2.1749	81.136	1.23114	3.31654
0.405058	2.46878	92.0995	1.83202	4.93524
0.376835	2.65368	98.9972	3.28029	8.8367
0.38274	2.61274	97.47	3.89586	10.4949
0.373056	2.68056	100	4.44745	11.9809
0.484708	2.0631	76.9652	10.3633	27.9175
0.484649	2.06335	76.9746	3.23409	8.71224
0.602677	1.65926	61.8999	3.14634	8.47585
0.658886	1.51771	56.6193	2.94344	7.92926
0.653277	1.53074	57.1054	2.64789	7.13308
0.685278	1.45926	54.4387	3.44921	9.29174
0.676422	1.47837	55.1514	4.73898	12.7662
0.645956	1.54809	57.7527	5.13197	13.8249
0.672997	1.48589	55.4321	6.95608	18.7388
0.703582	1.4213	53.0225	6.59567	17.7679
0.739244	1.35273	50.4646	6.17144	16.6251
0.774316	1.29146	48.1788	5.05877	13.6277
0.8	1.25	46.6321	5.05763	13.6246
0.89075	1.12265	41.8812	3.44296	9.27491
1.01515	0.985072	36.7487	4.42233	11.9132
1.0517	0.950839	35.4717	5.04641	13.5944
0.943771	1.05958	39.5283	4.98481	13.4285
0.9185	1.08873	40.6158	5.46985	14.7351
0.913541	1.09464	40.8363	5.69162	15.3325
0.918855	1.08831	40.6002	5.92184	15.9527
0.862999	1.15875	43.2279	6.85313	18.4615
0.816768	1.22434	45.6747	6.85593	18.469
0.750699	1.33209	49.6946	8.04054	21.6602
0.731451	1.36715	51.0023	10.7596	28.985
0.762862	1.31085	48.9022	12.2785	33.0768
0.723362	1.38243	51.5726	17.5578	47.2985
0.817359	1.22345	45.6417	24.7477	66.6673
0.967979	1.03308	38.5397	35.7996	96.4395
0.940701	1.06304	39.6573	25.0501	67.4819
0.810451	1.23388	46.0307	16.6398	44.8255
0.856268	1.16786	43.5677	15.1615	40.8432
0.902381	1.10818	41.3413	14.7595	39.7602
0.844105	1.18469	44.1955	9.92844	26.746
0.940464	1.0633	39.6673	7.51315	20.2395
1.00689	0.993159	37.0504	6.93562	18.6837
1.10974	0.90111	33.6165	7.11517	19.1674
1.12055	0.892421	33.2924	8.01434	21.5896
1.02442	0.976158	36.4162	11.1664	30.081
1.17351	0.852145	31.7898	11.4508	30.8471
1.2296	0.813272	30.3397	10.4326	28.1041
1.27684	0.783186	29.2173	13.0591	35.1795
1.28959	0.775441	28.9283	22.7637	61.3226
1.35855	0.736078	27.4599	37.1213	100
1.47534	0.67781	25.2861	27.3521	73.6832
1.47197	0.67936	25.344	12.8652	34.6573
1.61604	0.618797	23.0846	13.5474	36.4949
1.79754	0.556316	20.7537	19.853	53.4814
1.92265	0.520115	19.4032	29.8887	80.5165
2.07947	0.480891	17.94	17.349	46.736

[truncated: 6 more sheets: Emonet 1987, Dengler 1988, Kanda 1992, Manuel 2011, Martinez Silva 2018, Mouse-Ftw-R]
